# Supplementary material
Source: PubMed Central journal article supplement (PMC4083805)
Supplement: rspb20141032supp1.pdf [file rspb20141032supp1.pdf]

## CULTIVATION BEHAVIOUR AND TERRITORIAL DEFENSE

For each species, two observers monitored resource-related behaviours and defense for a total of 500 minutes of observation over four days. Each day, damselfish ( $n=10$ ) were monitored for five 90 minutes observational periods between 700 and 1630 h (700-830, 900-1030, 1100-1230, 1300-1430, 1500-1630 h). During each 90-minute period, ten individuals were observed per observer for five minutes. The number of bites (grazing turf algae, coral-pecking, weeding of undesirable species) and defecations were recorded per minute during each five-minute period. Observers also noted aggressive interspecific and intraspecific interactions (territorial defense), including the species, size of the intruder, and the frequency of the attack during the observational period (Newton 1994). To compare the maximum bite-rates of turf algae, weeding, and coral-pecking between *S. apicalis* and *S. nigricans*, we used paired two-tailed t-tests.

Maximum bite rates were significantly higher for *S. nigricans* than *S. apicalis* for grazing turf algae and weeding undesirable species (table S3; figure S2a,b), suggesting that *S. nigricans* is a more intensive territorial grazer than *S. apicalis*. The maximum bite-rate of turf algae for *S. nigricans* is approximately 30% higher than the maximum bite-rate for *S. apicalis* (figure S2a). Although *S. nigricans* has a smaller average territory size than *S. apicalis* (approximately 0.5 m<sup>2</sup> and 1 m<sup>2</sup>, respectively), turf algae in *S. nigricans*' territories are substantially thicker and obtain a higher biomass via cultivation on branching acroporids as opposed to barren flat regions on the benthos (figure 1), as was described in the algal composition surveys. *S. nigricans* appear to engage in higher rates of grazing or 'farming' turf algae to sustain and further propagate thick turf algal mats within their territories. Rates of coral-pecking do not differ significantly between *S. apicalis* and *S. nigricans* (table S3) and remain low throughout the day, suggesting that territorial grazers play a minimal role in damaging coral colonies (figure S2c).

*S. apicalis* and *S. nigricans* pugnaciously chase away a wide array of intruders across all feeding guilds (figure S4; figure S5). For both species of *Stegastes*, no aggressive interactions were observed with lutjanids, serranids and adult scarids that were greater than 40 cm. However, *S. apicalis* did not react aggressively to territory invasions by holocentrids, scorpaenids and *Dischistodus melanotus*, suggesting that *S. apicalis* is aggressive to a smaller array of intruders than *S. nigricans*. *Stegastes*' defense against species across feeding guilds shows that they not only guard turf algae from herbivores and omnivores (including detritivores), they opportunistically protect all their resources, including invertebrates and corals from carnivores and corallivores (figure S4).

## TABLES AND FIGURES

**Table S1.** Assignments of bacterial genera into metabolic categories (autotrophs, heterotrophs, and potential pathogens). “R” denotes reference for metabolic grouping.

| <b>Autotrophs</b>          | <b>R</b> | <b>Heterotrophs</b>          | <b>R</b> | <b>Potential pathogens</b> | <b>R</b> |
|----------------------------|----------|------------------------------|----------|----------------------------|----------|
| <i>Anabaena</i>            | S1       | <i>Afifella</i>              | S19      | <i>Bartonella</i>          | S37      |
| <i>Aphanizomenon</i>       | S1       | <i>Candidatus Microthrix</i> | S20      | <i>Cardiobacterium</i>     | S38      |
| <i>Arthrospira</i>         | S2       | <i>Chondromyces</i>          | S21      | <i>Inquilinus</i>          | S39      |
| <i>Chamaesiphon</i>        | S3       | <i>Congregibacter</i>        | S22      | <i>Leptolyngbya*</i>       | S40      |
| <i>Cylindrospermopsis</i>  | S4       | <i>Flammeovirga</i>          | S23      | <i>Oscillatoria*</i>       | S40      |
| <i>Gloeobacter</i>         | S5       | <i>Kordia</i>                | S24      |                            |          |
| <i>Microcoleus</i>         | S6       | <i>Lewinella</i>             | S25      |                            |          |
| <i>Nitrospira</i>          | S7       | <i>Magnetococcus</i>         | S26      |                            |          |
| <i>Paracoccus</i>          | S8       | <i>Magnetospirillum</i>      | S27      |                            |          |
| <i>Planktothricoides</i>   | S9       | <i>Methylobacterium</i>      | S28      |                            |          |
| <i>Prochlorococcus</i>     | S10      | <i>Nisaea</i>                | S29      |                            |          |
| <i>Prochlorothrix</i>      | S9, S11  | <i>Oceanicola</i>            | S30      |                            |          |
| <i>Rhodovibrio</i>         | S12      | <i>Opitutus</i>              | S31      |                            |          |
| <i>Spirulina</i>           | S13      | <i>Phaeobacter</i>           | S32      |                            |          |
| <i>Synechococcus</i>       | S14      | <i>Pirellula</i>             | S33      |                            |          |
| <i>Thermosynechococcus</i> | S15      | <i>Rhodopirellula</i>        | S34      |                            |          |
| <i>Thioalkalivibrio</i>    | S16      | <i>Ruegeria</i>              | S32      |                            |          |
| <i>Thiorhodovibrio</i>     | S17      | <i>Shinella</i>              | S35      |                            |          |
| <i>Trichodesmium</i>       | S18      | <i>Wolbachia</i>             | S36      |                            |          |

\**Leptolyngbya* and *Oscillatoria* are coral-specific potential pathogens associated with black band disease.

**Table S2.** Average percent composition of turf algae and macroalgae found inside *S. apicalis*' territories, inside *S. nigricans*' territories and excluded from *Stegastes*' territories in the lagoon around Lizard Island in the northern GBR (A = abundant, 50-100 percent cover; O = occasional, 20-50 percent cover; R = rare, 0-20 percent cover).

| Turf Algae/Macroalgae            | <i>S. apicalis</i> ' territories |   |   | <i>S. nigricans</i> ' territories |   |   | Excluded from territories |   |   |
|----------------------------------|----------------------------------|---|---|-----------------------------------|---|---|---------------------------|---|---|
|                                  | A                                | O | R | A                                 | O | R | A                         | O | R |
| <i>Polysiphonia</i> sp.          | X                                |   |   | X                                 |   |   |                           |   |   |
| <i>Amphiroa foliacea</i>         |                                  |   | X |                                   |   | X |                           |   |   |
| <i>Ceramium</i> sp.              |                                  |   | X |                                   |   | X |                           |   |   |
| <i>Hormothamnion</i> sp.*        |                                  | X | X |                                   | X | X |                           |   |   |
| <i>Dictyosphaeria cavernosa</i>  |                                  |   | X |                                   |   |   |                           |   |   |
| <i>Lithophyllum moluccense</i>   |                                  |   | X |                                   |   |   |                           |   |   |
| <i>Lithophyllum kotschyannum</i> |                                  |   | X |                                   |   |   |                           |   |   |
| <i>Cladophora socialis</i>       |                                  |   | X |                                   |   |   |                           |   |   |
| Crustose coralline algae         |                                  |   | X |                                   |   |   |                           |   |   |
| <i>Halimeda opuntia</i>          |                                  |   | X |                                   |   |   |                           | X |   |
| <i>Sargassum crassifolium</i>    |                                  |   |   |                                   |   |   |                           | X |   |
| <i>Turbinaria ornata</i>         |                                  |   |   |                                   |   |   |                           | X |   |
| <i>Padina</i> sp.                |                                  |   |   |                                   |   |   |                           |   | X |
| <i>Ventricaria</i> sp.           |                                  |   |   |                                   |   |   |                           |   | X |

\**Hormothamnion* sp. is highly seasonal (occasional in the summer months and rare in the winter months in *S. apicalis* and *S. nigricans*' territories).

**Table S3.** Diversity metrics describing algal community composition, including average value and standard error (SE) for *S. apicalis*' territories and *S. nigricans*' territories as well as the t-value, degrees of freedom (df) and p-value results of a paired two-tailed t-test. Shaded cells contain statistically significant values ( $p < 0.05$ ).

| Diversity metrics  | <i>S. apicalis</i> |       | <i>S. nigricans</i> |       | t-value | df | p-value  |
|--------------------|--------------------|-------|---------------------|-------|---------|----|----------|
|                    | Average            | SE    | Average             | SE    |         |    |          |
| Species richness   | 6.4                | 0.4   | 3.2                 | 0.172 | 6.839   | 19 | < 0.0001 |
| Evenness           | 0.712              | 0.015 | 0.553               | 0.024 | 9.967   | 19 | < 0.0001 |
| Shannon Index (H') | 1.301              | 0.072 | 0.632               | 0.048 | 9.272   | 19 | < 0.0001 |

**Table S4.** T-value, degrees of freedom (df) and p-value results of a paired two-tailed t-test comparing the maximum bite-rates of grazing turf-algae, weeding undesirable species and coral-pecking between *S. apicalis* and *S. nigricans*. “Time of day” indicates the time of day at which bite-rates of the respective resource-related behaviour reaches a maximum. Shaded cells contain statistically significant values ( $p < 0.05$ ).

| <b>Bite-rates</b> | <b>Time of day</b> | <b>t-value</b> | <b>df</b> | <b>p-value</b> |
|-------------------|--------------------|----------------|-----------|----------------|
| Turf algae        | 1300-1430 h        | -3.818         | 35        | < 0.001        |
| Weeding           | 900-1030 h         | 4.792          | 35        | < 0.001        |
| Coral pecking     | 900-1030 h         | -0.407         | 35        | 0.686          |

**Table S5.** Kruskal-Wallis one-way of analysis of variance chi-squared ( $\chi^2$ ) and p-value results for the relative abundances of autotrophs, heterotrophs and coral-specific potential pathogens in the EAM in control plots outside of *Stegastes*' territories as compared to the relative abundances autotrophs, heterotrophs and coral-specific potential pathogens in the EAM in *S. apicalis*' territories and in *S. nigricans*' territories. Shaded cells contain statistically significant values ( $p < 0.05$ ).

| Microbial Community | <i>S. apicalis</i> |         | <i>S. nigricans</i> |         |
|---------------------|--------------------|---------|---------------------|---------|
|                     | $\chi^2$           | p-value | $\chi^2$            | p-value |
| Autotrophs          | 6.615              | 0.010   | 0.111               | 0.739   |
| Heterotrophs        | 3.84               | 0.050   | 8.218               | 0.004   |
| Potential pathogens | 4.335              | 0.037   | 7.471               | 0.006   |

**Table S6.** Summary of cyanobacterial potential coral pathogens (that were assigned to *Leptolyngbya*; comprised of 168 OTUs) matched to bacteria with the highest sequence similarity in BLAST, including the OTU number, percent abundance (of our OTUs), identity (percent similarity), definition (grouping of top match), environmental source, accession number and reference. Stars indicate additional high BLAST matches that are associated with corals, coral disease and marine environments.

| OTU      | Percent | Identity | Definition                                 | Source                                                 | Accession | Ref   |
|----------|---------|----------|--------------------------------------------|--------------------------------------------------------|-----------|-------|
| OTU_3    | 19.928  | 98       | Uncultured bacterium clone                 | BBD affected corals                                    | GU471954  | S41   |
| OTU_344  | 13.814  | 98       | Uncultured bacterium clone                 | BBD affected corals                                    | GU471954  | S41   |
| OTU_1560 | 7.951   | 92       | Uncultured bacterium clone                 | Coral-associated                                       | AF365814  | S42   |
| OTU_12   | 5.567   | 98       | Uncultured Nostocales cyanobacterium clone | Intertidal button thrombolitic mat                     | HQ415796  | S43   |
| OTU_3458 | 3.653   | 95       | Uncultured bacterium clone                 | BBD affected corals                                    | GU471954  | S41   |
| OTU_5    | 3.161   | 94       | Uncultured bacterium clone                 | Coral-associated                                       | AF365814  | S42   |
| OTU_60   | 2.855   | 99       | Uncultured bacterium clone                 | Necrosed coral tissue                                  | AY529887  | S47   |
| OTU_30   | 2.264   | 98       | Uncultured bacterium clone                 | BBD affected corals                                    | GU471955  | S41   |
| OTU_38   | 2.089   | 94       | Uncultured cyanobacterium                  | Seawater                                               | AM259754  | S44   |
|          |         | 96       | Uncultured cyanobacterium clone            | Black band disease mat                                 | JX463398  | S96*  |
| OTU_2408 | 2.089   | 91       | Uncultured bacterium clone                 | Coral-associated                                       | AF365814  | S42   |
| OTU_40   | 2.056   | 99       | Uncultured bacterium clone                 | Oolitic sand                                           | JX504463  | S45   |
|          |         | 98       | Uncultured bacterium clone                 | Associated with <i>Porites</i> sp.                     | EU636615  | S78*  |
| OTU_45   | 2.012   | 96       | Uncultured bacterium clone                 | BBD affected corals                                    | GU471955  | S41   |
| OTU_287  | 1.947   | 99       | Uncultured Nostocales cyanobacterium clone | Intertidal button thrombolitic mat                     | HQ415796  | S43   |
| OTU_35   | 1.848   | 97       | Uncultured bacterium clone                 | Coral-associated                                       | AF365814  | S42   |
| OTU_63   | 1.695   | 99       | Uncultured marine bacterium clone          | CaCO <sub>3</sub> deposition, metallic artificial reef | FJ594839  | S48   |
|          |         | 98       | Uncultured cyanobacterium clone            | Black band diseased coral tissue                       | EF123578  | S101* |
| OTU_57   | 1.367   | 92       | Uncultured bacterium clone                 | <i>Montastraea faveolata</i> - healthy tissue          | FJ203453  | S46   |
| OTU_76   | 1.006   | 96       | Uncultured bacterium clone                 | BBD affected corals                                    | GU471955  | S41   |
| OTU_263  | 0.973   | 99       | Uncultured Nostocales cyanobacterium clone | Intertidal button thrombolitic mat                     | HQ415796  | S43   |
| OTU_90   | 0.908   | 97       | Uncultured cyanobacterium                  | Seawater                                               | AM259754  | S44   |
|          |         | 97       | Uncultured cyanobacterium clone            | Black band disease mat                                 | JX463398  | S96*  |
| OTU_114  | 0.908   | 96       | Uncultured bacterium clone                 | Coral-associated                                       | AF365814  | S42   |
| OTU_1582 | 0.886   | 97       | Uncultured bacterium clone                 | BBD affected corals                                    | GU471954  | S41   |
| OTU_122  | 0.809   | 98       | Uncultured bacterium clone                 | <i>Porites astreoides</i>                              | GU118939  | S49   |
| OTU_123  | 0.689   | 99       | Uncultured bacterium clone                 | <i>Montastraea faveolata</i> - healthy tissue          | FJ203581  | S46   |
| OTU_229  | 0.667   | 96       | Uncultured bacterium clone                 | BBD affected corals                                    | GU471955  | S41   |
| OTU_1729 | 0.623   | 96       | Uncultured bacterium clone                 | BBD affected corals                                    | GU471954  | S41   |
| OTU_153  | 0.591   | 95       | Uncultured bacterium clone                 | Coral-associated                                       | AF365814  | S42   |



|          |       |    |                                                 |                                                |          |       |
|----------|-------|----|-------------------------------------------------|------------------------------------------------|----------|-------|
| OTU_171  | 0.525 | 96 | Uncultured cyanobacterium                       | Seawater                                       | AM259754 | S44   |
|          |       | 97 | Uncultured cyanobacterium clone                 | Black band disease mat                         | JX463398 | S96*  |
| OTU_189  | 0.481 | 98 | Uncultured cyanobacterium                       | Marine sediment                                | AM177431 | S50   |
| OTU_1659 | 0.470 | 97 | Uncultured bacterium clone                      | Diseased tissue                                | JQ516288 | S69   |
| OTU_55   | 0.470 | 98 | Uncultured <i>Rivularia</i> sp.                 | Rock surface of calcareous river               | EU009142 | S91   |
|          |       | 98 | Uncultured bacterium clone                      | Biofilm, glass                                 | JF262020 | S102* |
| OTU_87   | 0.470 | 94 | Uncultured Oscillatoriales cyanobacterium clone | Quartz, Tibet desert                           | FJ790628 | S92   |
| OTU_238  | 0.470 | 96 | Uncultured bacterium clone                      | Coral-associated                               | AF365814 | S42   |
| OTU_266  | 0.459 | 99 | Uncultured bacterium clone                      | <i>Montipora</i> tissue                        | FJ809378 | S52   |
| OTU_199  | 0.448 | 94 | Uncultured cyanobacterium                       | Seawater                                       | AM259754 | S44   |
|          |       | 93 | Uncultured bacterium clone                      | Coral-associated                               | AF365814 | S42*  |
| OTU_2230 | 0.448 | 92 | Uncultured bacterium clone                      | <i>Montastraea faveolata</i> - healthy tissue  | FJ203574 | S46   |
| OTU_1397 | 0.427 | 98 | <i>Aphanocapsa</i> sp.                          | Bahamian marine stromatolite                   | EU249123 | S66   |
| OTU_1049 | 0.416 | 99 | Uncultured bacterium clone                      | Biofilm, glass                                 | JQ727046 | S61   |
| OTU_1891 | 0.416 | 96 | Uncultured bacterium clone                      | Coral-associated                               | AF365814 | S42   |
| OTU_1142 | 0.416 | 97 | Uncultured bacterium clone                      | BBD affected corals                            | GU471954 | S41   |
| OTU_225  | 0.405 | 96 | Uncultured bacterium clone                      | Sandy carbonate sediment                       | EF208676 | S51   |
|          |       | 96 | <i>Aphanocapsa</i> sp.                          | Bahamian marine stromatolite                   | EU249123 | S66*  |
| OTU_2136 | 0.383 | 94 | Uncultured bacterium clone                      | <i>Montastraea faveolata</i> - diseased tissue | FJ203286 | S46   |
| OTU_1301 | 0.328 | 97 | Uncultured bacterium clone                      | BBD affected corals                            | GU471954 | S41   |
| OTU_353  | 0.306 | 97 | Uncultured bacterium clone                      | Coral-associated                               | AF365814 | S42   |
| OTU_342  | 0.295 | 99 | Uncultured bacterium clone                      | Oolitic sand                                   | JX504282 | S45   |
| OTU_350  | 0.284 | 99 | Uncultured bacterium clone                      | <i>Diploria strigosa</i>                       | GU118301 | S49   |
| OTU_764  | 0.284 | 94 | Uncultured bacterium clone                      | BBD affected corals                            | GU471955 | S41   |
| OTU_147  | 0.273 | 98 | Uncultured bacterium clone                      | <i>Montastraea faveolata</i> - healthy tissue  | FJ203523 | S46   |
| OTU_523  | 0.262 | 95 | Uncultured cyanobacterium clone                 | White syndrome, <i>Turbinaria mesenterina</i>  | EU780386 | S55   |
| OTU_3487 | 0.262 | 95 | Uncultured bacterium clone                      | BBD affected corals                            | GU471954 | S41   |
| OTU_375  | 0.252 | 94 | Uncultured bacterium clone                      | <i>Montastraea faveolata</i> - healthy tissue  | FJ203581 | S46   |
| OTU_441  | 0.241 | 97 | Uncultured cyanobacterium clone                 | Intertidal thrombolites                        | GQ484027 | S54   |
| OTU_425  | 0.219 | 99 | Uncultured bacterium clone                      | <i>Crassostrea gigas</i>                       | JF827522 | S53   |
| OTU_189  | 0.219 | 96 | Cyanobacterium                                  | Black band diseased <i>S. siderea</i>          | EF372582 | S93   |
| OTU_792  | 0.186 | 97 | <i>Calothrix</i> sp.                            | Rock surface, littoral zone, Baltic Sea        | AM230670 | S73   |
|          |       | 96 | Uncultured Nostocales cyanobacterium clone      | Intertidal button thrombotic mat               | HQ415796 | S43*  |
| OTU_2732 | 0.175 | 94 | Uncultured Nostocales cyanobacterium clone      | Intertidal button thrombotic mat               | HQ415796 | S43   |
| OTU_432  | 0.175 | 98 | Uncultured cyanobacterium clone                 | Microbial mat                                  | DQ181693 | S95   |
| OTU_1172 | 0.164 | 96 | Uncultured cyanobacterium clone                 | Permeable shelf sediment                       | DQ289927 | S64   |
| OTU_1609 | 0.164 | 92 | Oscillatoriales cyanobacterium                  | Oscillatoriales cyanobacterium                 | KC463193 | S68   |

|          |       |    |                                                 |                                               |          |      |
|----------|-------|----|-------------------------------------------------|-----------------------------------------------|----------|------|
| OTU_298  | 0.164 | 96 | Uncultured cyanobacterium                       | Sponge cortex                                 | AM259864 | S44  |
| OTU_2653 | 0.153 | 95 | Uncultured bacterium clone                      | Associated with <i>Porites</i> sp. coral      | EU636510 | S78  |
| OTU_3096 | 0.153 | 96 | Uncultured bacterium clone                      | BBD affected corals                           | GU471955 | S41  |
| OTU_2047 | 0.142 | 96 | Uncultured bacterium clone                      | Particle-attached bacteria fraction           | EU636510 | S78* |
| OTU_744  | 0.131 | 94 | Uncultured bacterium clone                      | Endolith                                      | JX258078 | S56  |
| OTU_763  | 0.131 | 96 | Uncultured cyanobacterium                       | Sponge cortex                                 | AM259864 | S44  |
| OTU_783  | 0.131 | 95 | Uncultured bacterium clone                      | <i>Montastraea faveolata</i> - healthy tissue | FJ203453 | S46  |
| OTU_2099 | 0.131 | 95 | Uncultured bacterium clone                      | BBD affected corals                           | GU471954 | S41  |
| OTU_473  | 0.131 | 92 | Uncultured Oscillatoriales cyanobacterium clone | Quartz, Tibet desert                          | FJ790628 | S92  |
| OTU_648  | 0.120 | 92 | Uncultured bacterium clone                      | <i>Montastraea faveolata</i> - healthy tissue | FJ203581 | S46  |
| OTU_859  | 0.109 | 97 | Uncultured bacterium clone                      | Coral-associated                              | AF365850 | S42  |
| OTU_978  | 0.109 | 99 | Uncultured cyanobacterium                       | <i>Xestospongia muta</i> sponge               | GU590841 | S58* |
| OTU_1021 | 0.109 | 96 | <i>Chroococciopsis</i> sp.                      | <i>Chroococciopsis</i> sp.                    | JF810076 | S60  |
| OTU_1024 | 0.109 | 94 | Uncultured bacterium clone                      | <i>Montastraea faveolata</i> - healthy tissue | FJ203615 | S46  |
| OTU_75   | 0.109 | 95 | Uncultured bacterium clone                      | <i>Montastraea faveolata</i> - healthy tissue | FJ203453 | S46  |
| OTU_787  | 0.098 | 97 | Uncultured Nostocales cyanobacterium clone      | Intertidal button thrombolytic mat            | HQ415796 | S43  |
| OTU_931  | 0.098 | 99 | Uncultured bacterium clone                      | Coral mucus                                   | FJ152382 | S57  |
| OTU_951  | 0.098 | 94 | Uncultured cyanobacterium clone                 | Intertidal thrombolites                       | GQ484055 | S54  |
| OTU_1093 | 0.098 | 97 | Uncultured bacterium clone                      | Seawater                                      | KC294803 | S62  |
| OTU_1135 | 0.098 | 96 | <i>Leptolyngbya</i> sp.                         | Red Sea                                       | JX470180 | S63  |
| OTU_1476 | 0.098 | 95 | Uncultured bacterium clone                      | BBD affected corals                           | GU471954 | S41  |
| OTU_2679 | 0.098 | 91 | <i>Rivularia</i> sp.                            | Intertidal zone                               | KC989702 | S80  |
| OTU_1010 | 0.098 | 93 | Uncultured cyanobacterium                       | Seawater                                      | AM259746 | S44  |
|          |       | 93 | Uncultured cyanobacterium clone                 | Black band disease mat                        | JX463422 | S96* |
| OTU_91   | 0.098 | 96 | Uncultured cyanobacterium                       | Seawater                                      | AM259754 | S44  |
|          |       | 97 | Uncultured cyanobacterium clone                 | Black band disease mat                        | JX463398 | S96* |
| OTU_421  | 0.098 | 97 | <i>Aphanocapsa</i> sp.                          | Bahamian marine stromatolite                  | EU249123 | S66  |
| OTU_1860 | 0.098 | 96 | Uncultured bacterium clone                      | <i>Montastraea faveolata</i> - healthy tissue | FJ203604 | S46  |
| OTU_1002 | 0.087 | 96 | Uncultured bacterium                            | Highly saline rhizospheric soil               | HG938349 | S59  |
| OTU_1003 | 0.087 | 96 | Uncultured bacterium clone                      | Necrosed coral tissue                         | AY529887 | S47  |
| OTU_1630 | 0.087 | 97 | Uncultured bacterium                            | Highly saline rhizospheric soil               | HG938349 | S59  |
| OTU_1111 | 0.077 | 95 | Uncultured bacterium clone                      | <i>Porites astreoides</i>                     | GU118939 | S49  |
| OTU_1313 | 0.077 | 96 | Uncultured organism clone                       | <i>Acropora palmata</i>                       | GU119575 | S49  |
| OTU_1372 | 0.077 | 95 | <i>Cyanothece</i> sp.                           | <i>Cyanothece</i> sp.                         | AY620238 | S65  |
| OTU_2686 | 0.077 | 97 | Uncultured bacterium clone                      | <i>Diploria strigosa</i>                      | GU118152 | S49  |
| OTU_2890 | 0.077 | 91 | <i>Calothrix</i> sp.                            | Rock surface, littoral zone, Baltic Sea       | AM230670 | S73  |
| OTU_590  | 0.077 | 98 | Uncultured cyanobacterium clone                 | Black band disease mat                        | JX463398 | S96  |
| OTU_1462 | 0.066 | 94 | Uncultured cyanobacterium                       | Marine sediment                               | AM168001 | S67  |

|          |       |    |                                           |                                                        |          |       |
|----------|-------|----|-------------------------------------------|--------------------------------------------------------|----------|-------|
| OTU_1655 | 0.066 | 99 | Uncultured bacterium clone                | Oolitic sand                                           | JX504288 | S45   |
| OTU_1666 | 0.066 | 95 | Uncultured bacterium clone                | Oolitic sand                                           | JX504329 | S45   |
| OTU_3573 | 0.066 | 96 | Uncultured bacterium clone                | <i>Diploria strigosa</i>                               | GU118152 | S49   |
| OTU_425  | 0.066 | 98 | Cyanobacterium endosymbiont               | <i>Rhopalodia gibba</i>                                | AB546730 | S94   |
| OTU_560  | 0.066 | 98 | <i>Cyanothece</i> sp.                     | <i>Cyanothece</i> sp.                                  | CP000806 | S82   |
| OTU_1709 | 0.055 | 87 | Uncultured bacterium clone                | <i>Montastraea faveolata</i> - healthy tissue          | FJ203376 | S46   |
| OTU_1832 | 0.055 | 92 | Uncultured bacterium clone                | Sandy carbonate sediment                               | EF208676 | S51   |
| OTU_2116 | 0.055 | 94 | Uncultured bacterium clone                | Necrosed coral tissue                                  | AY529887 | S47   |
| OTU_2160 | 0.055 | 93 | Uncultured bacterium clone                | Coral-associated                                       | AF365814 | S42   |
| OTU_3125 | 0.055 | 94 | Uncultured organism clone                 | <i>Acropora palmata</i>                                | GU119563 | S49   |
| OTU_3185 | 0.055 | 98 | Uncultured bacterium                      | Sediment of Lake Jusan                                 | AB779889 | S87   |
| OTU_3388 | 0.055 | 92 | Uncultured bacterium clone                | <i>Montastraea faveolata</i> - diseased tissue         | FJ203286 | S46   |
| OTU_3557 | 0.055 | 97 | <i>Cyanothece</i> sp.                     | <i>Cyanothece</i> sp.                                  | CP001701 | S90   |
| OTU_3657 | 0.055 | 96 | Uncultured cyanobacterium                 | Seawater                                               | AM259754 | S44   |
|          |       | 96 | Uncultured cyanobacterium clone           | Black band disease mat                                 | JX463398 | S96*  |
| OTU_340  | 0.055 | 97 | <i>Aphanocapsa</i> sp.                    | Bahamian marine stromatolite                           | EU249123 | S66   |
| OTU_816  | 0.055 | 99 | Uncultured bacterium clone                | <i>Diploria strigosa</i>                               | GU118301 | S49   |
| OTU_1014 | 0.055 | 94 | Uncultured bacterium clone                | <i>Montastraea faveolata</i> - healthy tissue          | FJ203581 | S46   |
| OTU_1714 | 0.044 | 97 | Uncultured <i>Halomicronema</i> sp. clone | Hamelin pool seawater                                  | EF150805 | S70   |
| OTU_2080 | 0.044 | 98 | <i>Porphyridium purpureum</i> chloroplast | <i>Porphyridium purpureum</i>                          | AP012987 | S71   |
| OTU_2098 | 0.044 | 90 | Uncultured organism clone                 | <i>Acropora palmata</i>                                | GU119563 | S49   |
| OTU_2125 | 0.044 | 96 | Uncultured bacterium clone                | Sea                                                    | JF514264 | S72   |
|          |       | 96 | Uncultured bacterium clone                | Particle-attached bacteria                             | EU628072 | S78*  |
| OTU_2151 | 0.044 | 92 | <i>Calothrix</i> sp.                      | Rock surface, littoral zone, Baltic Sea                | AM230670 | S73   |
|          |       | 94 | Uncultured cyanobacterium clone           | microbial mat of black band disease                    | JX022546 | S103* |
| OTU_2181 | 0.044 | 94 | Uncultured bacterium clone                | Coral-associated                                       | AF365814 | S42   |
| OTU_2194 | 0.044 | 94 | Uncultured bacterium clone                | <i>Montastraea faveolata</i> - healthy tissue          | FJ203581 | S46   |
| OTU_2252 | 0.044 | 99 | Uncultured marine bacterium clone         | CaCO <sub>3</sub> deposition, metallic artificial reef | FJ594844 | S48   |
|          |       | 97 | <i>Leptolyngbya</i> sp.                   | <i>Leptolyngbya</i> sp.                                | AY493584 | S104* |
| OTU_2261 | 0.044 | 95 | Uncultured cyanobacterium clone           | Sediments, polluted with crude oil                     | JQ580215 | S74   |
| OTU_2353 | 0.044 | 97 | Uncultured cyanobacterium clone           | <i>Montastrea faveolata</i>                            | FJ425596 | S75   |
| OTU_2541 | 0.044 | 96 | Uncultured bacterium clone                | Biofilm on artificial substrates                       | KC299299 | S76   |
| OTU_2553 | 0.044 | 95 | Uncultured marine microorganism clone     | coastal tropical surface seawater                      | KC425580 | S77*  |
| OTU_2613 | 0.044 | 96 | Uncultured bacterium clone                | <i>Montastraea franksi</i>                             | GU118716 | S49   |
| OTU_2635 | 0.044 | 96 | Uncultured bacterium clone                | <i>Montastraea faveolata</i> , aquarium 23 days        | FJ202607 | S46   |
| OTU_2758 | 0.044 | 94 | Uncultured bacterium clone                | <i>Montastraea faveolata</i> - healthy tissue          | FJ203581 | S46   |

|          |       |    |                                            |                                                 |          |       |
|----------|-------|----|--------------------------------------------|-------------------------------------------------|----------|-------|
| OTU_2824 | 0.044 | 96 | <i>Cyanothece</i> sp.                      | <i>Cyanothece</i> sp.                           | CP000806 | S82   |
| OTU_2899 | 0.044 | 97 | Uncultured bacterium clone                 | BBD affected corals                             | GU471944 | S41   |
| OTU_3186 | 0.044 | 95 | Uncultured bacterium clone                 | Sediment collected from Merri Creek             | EU284458 | S88   |
| OTU_172  | 0.044 | 96 | Uncultured Nostocales cyanobacterium clone | Intertidal button thrombolitic mat              | HQ415796 | S43   |
| OTU_614  | 0.044 | 93 | Uncultured bacterium clone                 | <i>Montastraea faveolata</i> - healthy tissue   | FJ203453 | S46   |
| OTU_1083 | 0.044 | 93 | Uncultured cyanobacterium clone            | Microbial mat                                   | DQ181685 | S95   |
| OTU_1129 | 0.044 | 91 | Uncultured bacterium clone                 | <i>Montastraea faveolata</i> - healthy tissue   | FJ203574 | S46   |
| OTU_1159 | 0.044 | 94 | Uncultured bacterium clone                 | <i>Montastraea faveolata</i> - healthy tissue   | FJ203524 | S46*  |
| OTU_1318 | 0.044 | 91 | Uncultured cyanobacterium clone            | Intertidal thrombolites                         | GQ483866 | S54   |
| OTU_1346 | 0.044 | 94 | Uncultured cyanobacterium clone            | White syndrome, <i>Turbinaria mesenterina</i>   | EU780364 | S55*  |
| OTU_1510 | 0.044 | 95 | Uncultured bacterium clone                 | Seawater next to dolphin                        | JQ197040 | S97   |
|          |       | 95 | Uncultured bacterium clone                 | Marine bulk water                               | JX016995 | S105* |
| OTU_1540 | 0.044 | 98 | Uncultured cyanobacterium clone            | White syndrome, <i>Turbinaria mesenterina</i>   | EU780386 | S55   |
| OTU_2657 | 0.033 | 98 | Uncultured bacterium clone                 | <i>Acropora eurystoma</i> exposed to pH 7.3     | GU319302 | S79   |
| OTU_2741 | 0.033 | 97 | <i>Gloeothece</i> sp.                      | <i>Gloeothece</i> sp.                           | AB067580 | S81   |
| OTU_2775 | 0.033 | 96 | <i>Leptolyngbya</i> sp.                    | Red Sea                                         | JX470180 | S63   |
| OTU_2779 | 0.033 | 97 | Uncultured bacterium clone                 | Oolitic sand                                    | JX504499 | S45   |
| OTU_2857 | 0.033 | 94 | Uncultured bacterium clone                 | Antarctic soil, glacier forefield               | JX172450 | S83   |
|          |       | 94 | Uncultured cyanobacterium clone            | Beach sediment                                  | JX041703 | S84*  |
| OTU_2956 | 0.033 | 96 | Uncultured cyanobacterium clone            | Beach sediment                                  | JX041703 | S84   |
| OTU_3022 | 0.033 | 91 | Uncultured cyanobacterium clone            | Intertidal thrombolites                         | GQ484055 | S54   |
| OTU_3038 | 0.033 | 93 | Uncultured bacterium clone                 | Coral-associated                                | AF365814 | S42   |
| OTU_3043 | 0.033 | 93 | Uncultured organism clone                  | Guerrero Negro hypersaline mat                  | JN513686 | S85   |
| OTU_3063 | 0.033 | 97 | Cyanobacterium sp.                         | Soil                                            | KC695862 | S86   |
| OTU_3140 | 0.033 | 91 | Uncultured bacterium clone                 | <i>Montastraea faveolata</i> , aquarium 23 days | FJ202541 | S46   |
| OTU_3471 | 0.033 | 96 | Uncultured bacterium clone                 | BBD affected corals                             | GU471954 | S41   |
| OTU_3494 | 0.033 | 97 | Uncultured cyanobacterium                  | Microbial mat from stromatolite head            | AB602500 | S89   |
| OTU_3548 | 0.033 | 93 | Uncultured bacterium clone                 | Coral-associated                                | AF365814 | S42   |
| OTU_68   | 0.033 | 92 | Uncultured bacterium clone                 | <i>Montastraea faveolata</i> - healthy tissue   | FJ203453 | S46   |
| OTU_214  | 0.033 | 97 | Uncultured cyanobacterium                  | Seawater                                        | AM259754 | S44   |
|          |       | 97 | Uncultured cyanobacterium clone            | Black band disease mat                          | JX463398 | S96*  |
| OTU_532  | 0.033 | 97 | <i>Cyanothece</i> sp.                      | <i>Cyanothece</i> sp.                           | AB067581 | S81   |
| OTU_840  | 0.033 | 98 | Uncultured bacterium clone                 | Necrosed coral tissue                           | AY529887 | S47   |
| OTU_1221 | 0.033 | 99 | Uncultured Nostocales cyanobacterium clone | Intertidal button thrombolitic mat              | HQ415797 | S43   |
| OTU_1687 | 0.033 | 96 | Uncultured bacterium clone                 | <i>Porites astreoides</i>                       | GU118939 | S49   |

|          |       |    |                                         |                                               |          |      |
|----------|-------|----|-----------------------------------------|-----------------------------------------------|----------|------|
| OTU_1729 | 0.033 | 92 | Uncultured marine bacterium clone       | CaCO3 deposition, metallic artificial reef    | FJ594843 | S48  |
|          |       | 92 | <i>Leptolyngbya</i> sp.                 | Red Sea                                       | JX481735 | S63* |
| OTU_1799 | 0.033 | 93 | Uncultured cyanobacterium               | Coastal water                                 | AB691165 | S98  |
|          |       | 93 | Uncultured bacterium clone              | Coral-associated                              | AF365467 | S42* |
| OTU_1878 | 0.033 | 96 | Uncultured bacterium clone              | <i>Montastraea faveolata</i> - healthy tissue | FJ203524 | S46  |
| OTU_2252 | 0.033 | 91 | Uncultured bacterium isolate            | Mesophilic terrestrial mat                    | EF126282 | S99  |
| OTU_1754 | 0.022 | 92 | Filamentous thermophilic cyanobacterium | Filamentous cyanobacterium                    | DQ471445 | S100 |
| OTU_1755 | 0.022 | 91 | Uncultured bacterium clone              | <i>Montastraea faveolata</i> - healthy tissue | FJ203574 | S46  |
| OTU_72   | 0.011 | 95 | Uncultured bacterium clone              | Coral-associated                              | AF365814 | S42  |
| OTU_308  | 0.011 | 96 | Uncultured bacterium clone              | BBD affected corals                           | GU471955 | S41  |
| OTU_466  | 0.011 | 96 | Uncultured bacterium clone              | Coral-associated                              | AF365814 | S42  |
| OTU_1047 | 0.011 | 97 | Uncultured bacterium clone              | <i>Montastraea faveolata</i> - healthy tissue | FJ203453 | S46  |

**Table S7.** Summary of GLMM statistics showing the effects of *S. nigricans*' territories on the presence of black band disease in *Acropora muricata* outcrops. Shaded cells contain statistically significant values ( $p < 0.05$ ).

|                             | <b>Estimate</b> | <b>Std. Error</b> | <b>z-value</b> | <b>p-value</b> |
|-----------------------------|-----------------|-------------------|----------------|----------------|
| Intercept                   | -4.482          | 1.230             | -3.645         | <0.001         |
| <i>S. nigricans</i> present | 3.462           | 1.297             | 2.670          | 0.008          |

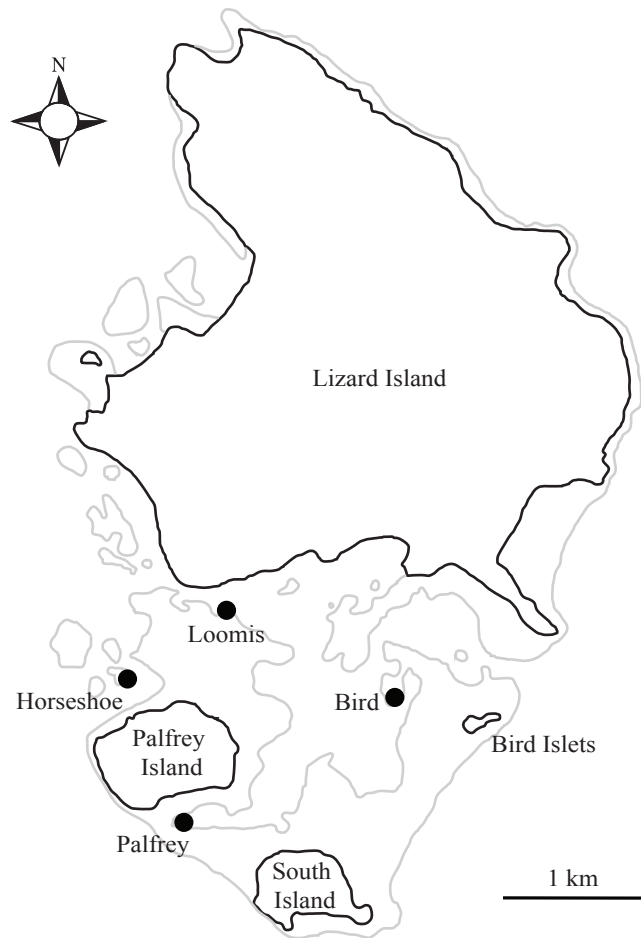

**Figure S1.** Map of Lizard Island and fringing reefs showing the microbial sampling site in the lagoon by Palfrey Island (Palfrey) and the four black band disease (BBD) survey sites (Palfrey, Bird, Loomis and Horseshoe).

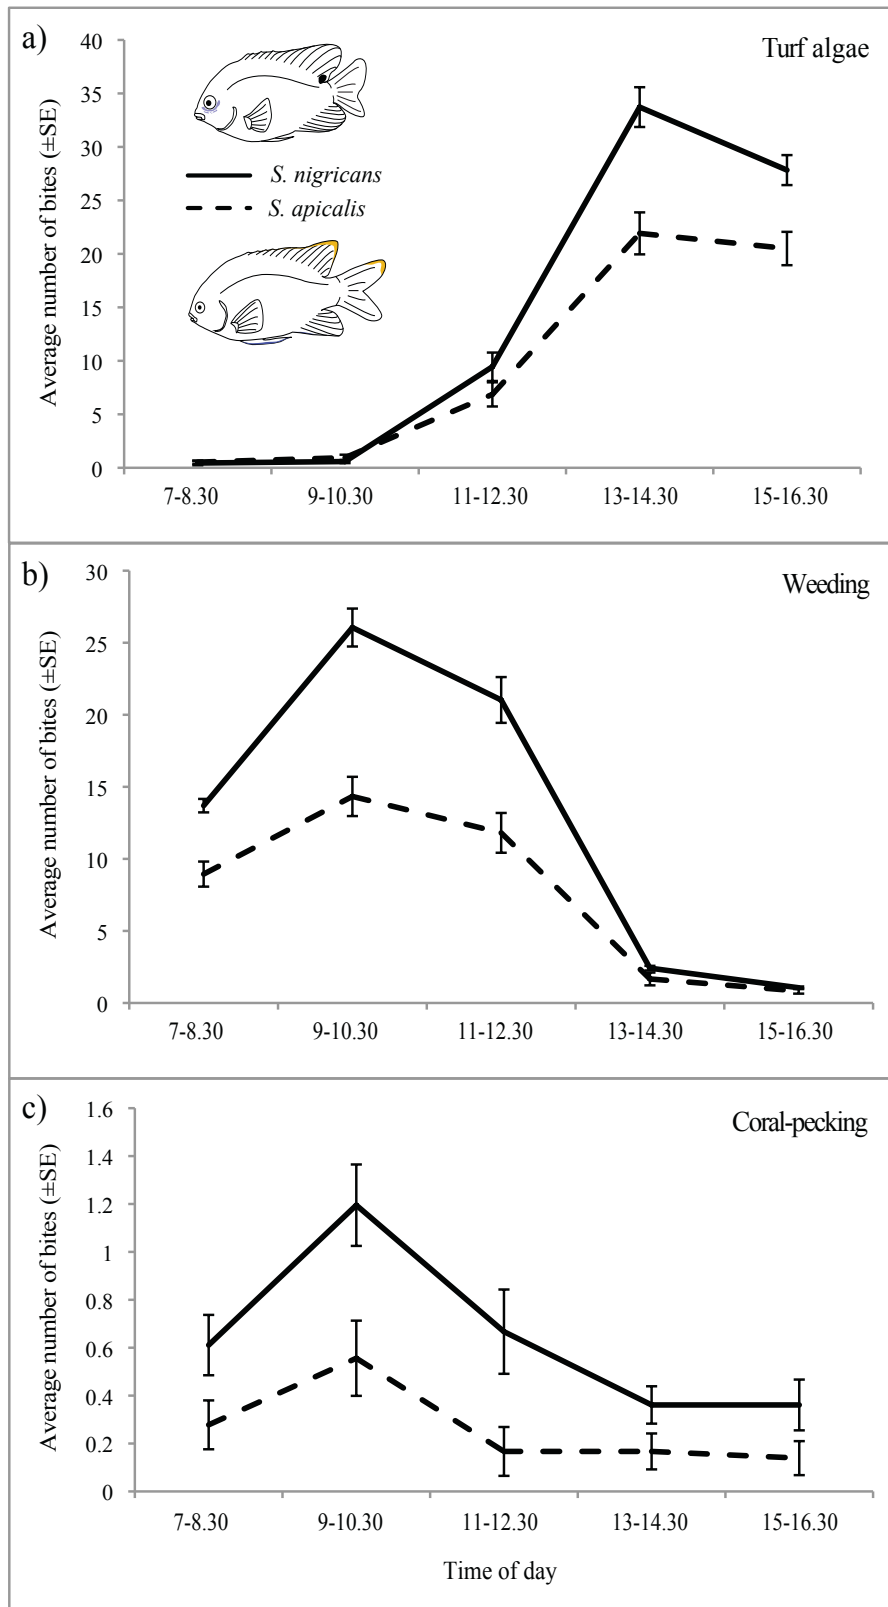

**Figure S2.** Three resource-related behaviours: (a) grazing turf algae, (b) weeding undesirable species and (c) coral-pecking of *S. apicalis* and *S. nigricans*. The number of bites for each resource-related behaviour was averaged across observational periods (five-minute periods).



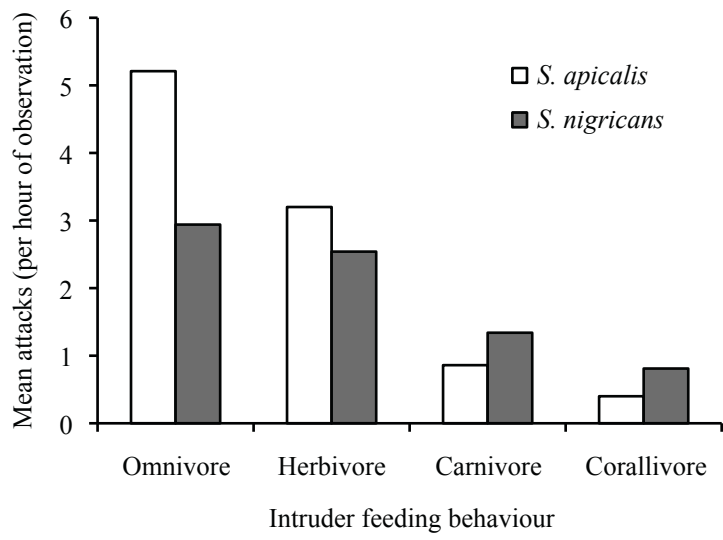

**Figure S3.** Territorial defense of *S. apicalis* and *S. nigricans* by intruder feeding guild.

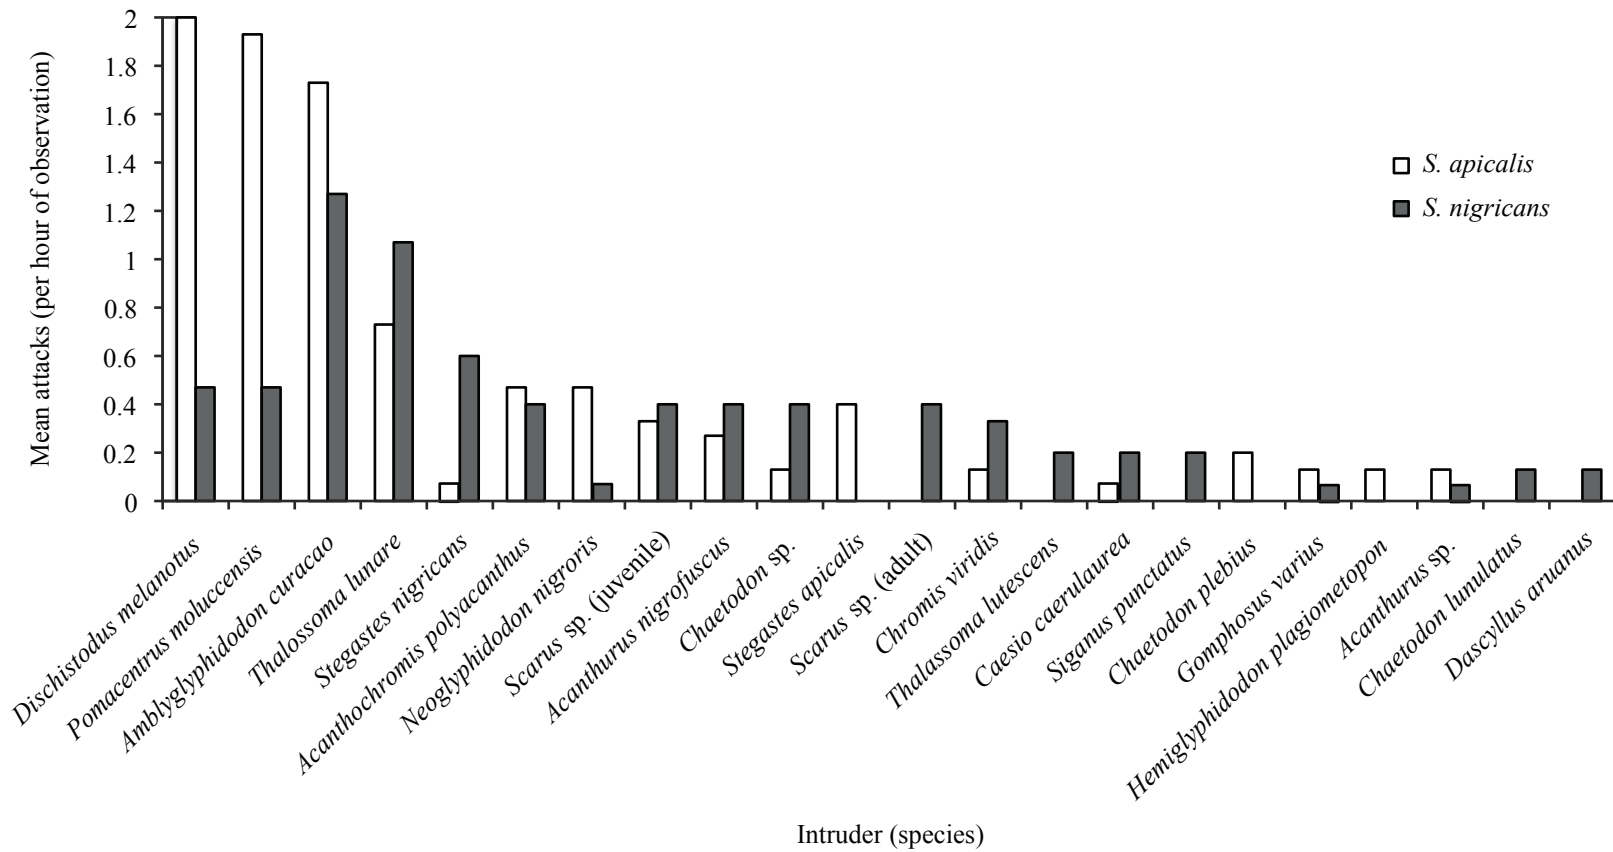

**Figure S4.** Territorial defense of *S. apicalis* and *S. nigricans* by intruding species.

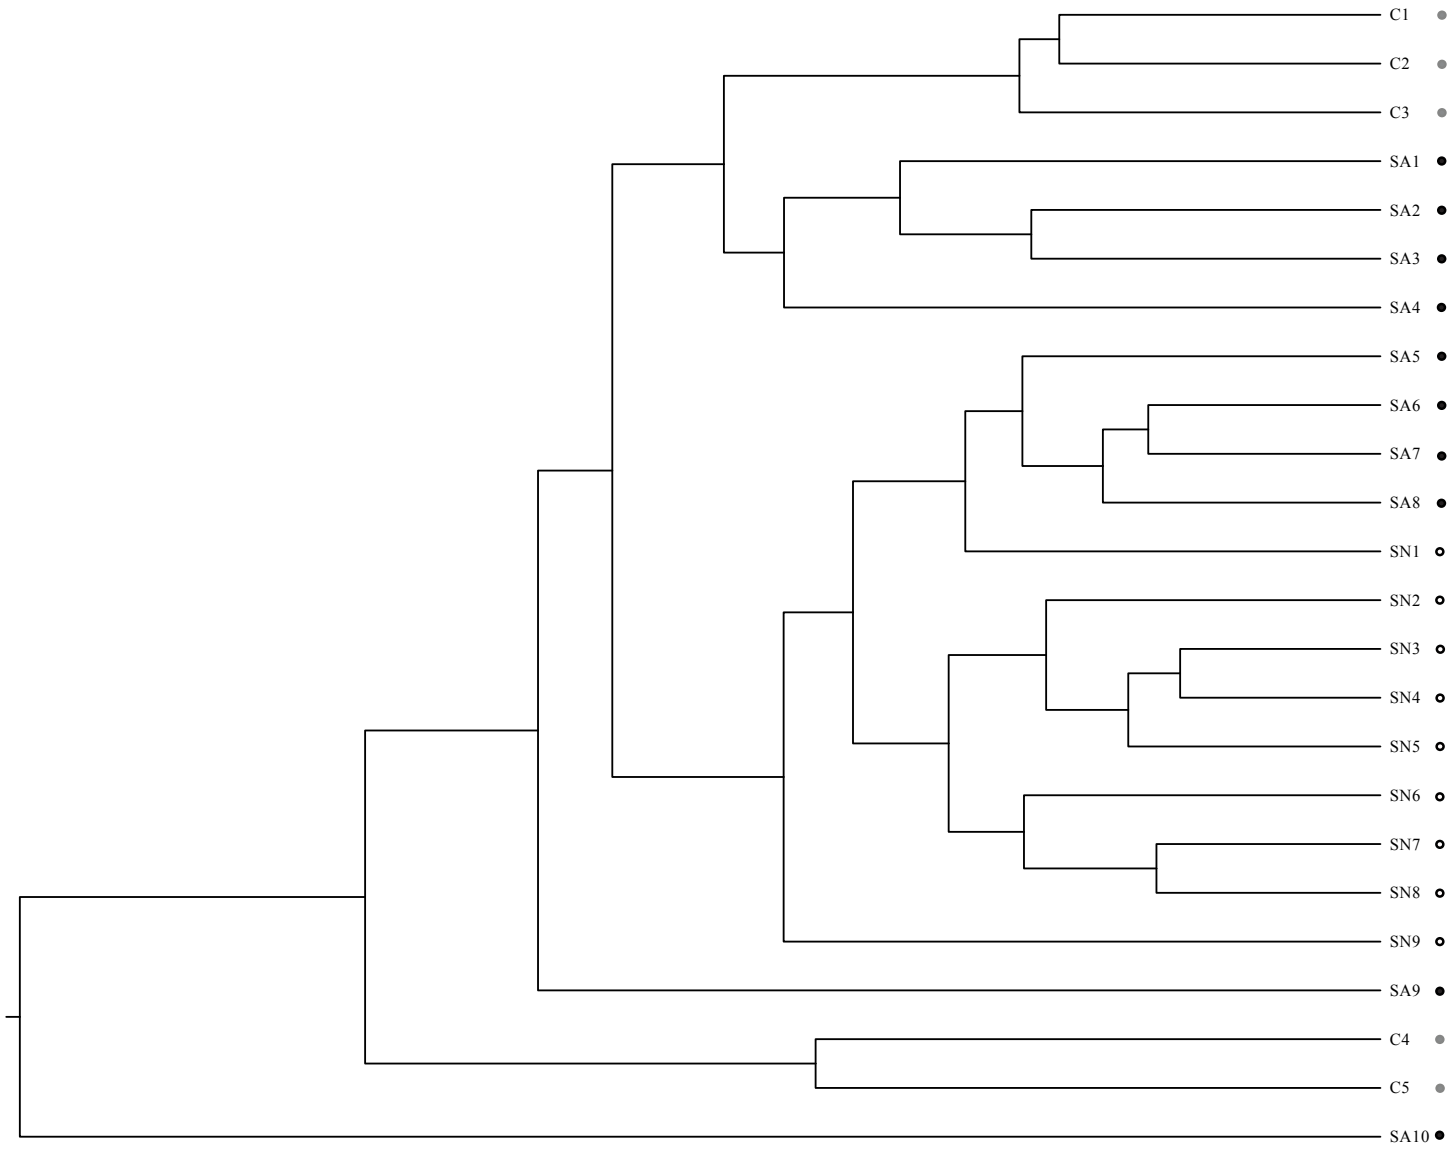

0.04

**Figure S5.** UPGMA cluster of EAM microbial community samples (C = control, EAM outside of damselfish territories; SA = EAM inside *S. apicalis*' territories; SN = EAM inside *S. nigricans*' territories). The circular symbols with which the sample is represented on figure 2 is included after the sample name.

|                |                                                                                      |     |
|----------------|--------------------------------------------------------------------------------------|-----|
| Majority       | GATGAACGCTGGCGGTATGCTTAACACATGCAAGTTGAACGAGAGCCT-AGCTCTAGTAGCGGACGGGTGAGTAATACGT     |     |
|                | 10 20 30 40 50 60 70 80                                                              |     |
| uncultured bbd | -----GAT-----                                                                        | 75  |
| OTU_3          | -----                                                                                | 79  |
| OUT344         | -----                                                                                | 79  |
| OTU3458        | -----                                                                                | 79  |
| OTU12          | -----CG- C-----C-----A T T CG A T-----G-----CG-----                                  | 80  |
| OTU1560        | -----C T-----GA TTA- T T C-----AA-----C-----                                         | 79  |
| Majority       | GAGAATCTACCTTTAGGAGGGGAATAACAATTGGAAACGATTGCTAATGCCCCATATGCTGTXAAGTGAAAAGATTTTTC     |     |
|                | 90 100 110 120 130 140 150 160                                                       |     |
| uncultured bbd | -----A-----T-----A-----                                                              | 155 |
| OTU_3          | -----G-----                                                                          | 159 |
| OUT344         | -----G-----                                                                          | 159 |
| OTU3458        | -----G-----                                                                          | 159 |
| OTU12          | -----G-----TTC-----G C-----G-----C-----A GA G T C AA GA-----A T                      | 159 |
| OTU1560        | A-----A-----G-----G-----GC-----AT-----CA-----TA-----C T                              | 159 |
| Majority       | GCCTAAAGATGAGCTCACGCCTGATTAGCTT-GTTGGTAGGGTAATGGCCTACCAAGGCTACGATCAGTAGCTGATTTGA     |     |
|                | 170 180 190 200 210 220 230 240                                                      |     |
| uncultured bbd | -----T-----                                                                          | 234 |
| OTU_3          | -----                                                                                | 238 |
| OUT344         | -----A-----                                                                          | 239 |
| OTU3458        | -----                                                                                | 238 |
| OTU12          | -----G T-----A-----G-----AA-----G-----G C-----                                       | 238 |
| OTU1560        | -----TG T-----A-----A-----GA T-----T-----T G-----                                    | 238 |
| Majority       | GAGGATGATCAGCCACACTGGAACCTGAGACACGGTCCAGACTTCTACGGAAGGCAGCAGTGGGGAATTTCCGCAAT-GG     |     |
|                | 250 260 270 280 290 300 310 320                                                      |     |
| uncultured bbd | -----                                                                                | 313 |
| OTU_3          | -----                                                                                | 317 |
| OUT344         | -----A T-----                                                                        | 319 |
| OTU3458        | -----                                                                                | 315 |
| OTU12          | -----G-----C-----C-----G-----                                                        | 317 |
| OTU1560        | -----C-----A-----                                                                    | 315 |
| Majority       | GCGCAA-GCCTGACGGAGCAATACCG-CGTGAGGGATGAATGCCTATGGGTTGTAAACC--TCTTTTATTGGGGAAGAA-     |     |
|                | 330 340 350 360 370 380 390 400                                                      |     |
| uncultured bbd | -----                                                                                | 388 |
| OTU_3          | -----                                                                                | 392 |
| OUT344         | -----A-----AG A                                                                      | 396 |
| OTU3458        | -----A-----GTCT-----C A                                                              | 394 |
| OTU12          | A-----CG-----G G T T-----CAA-----T-                                                  | 392 |
| OTU1560        | -----G-----T C-----A-----                                                            | 385 |
| Majority       | ---TTTGTACGGTA-CCC AATG--AAT AAGCATCGGCTAA-CTCCGTGCCAGCXGCCGCCGTAATXXXXXXXXXXXXXXXXX |     |
|                | 410 420 430 440 450 460 470                                                          |     |
| uncultured bbd | -----A-----G-----ACGGGGGATGCAAG                                                      | 460 |
| OTU_3          | -----C-----CACCTGAGAT                                                                | 460 |
| OUT344         | -----A-----C G AAC                                                                   | 456 |
| OTU3458        | GTT GA-----TA-----GA A-----A-----C-----A-----                                        | 459 |
| OTU12          | ---AA-----TTG-----C-----C-----                                                       | 449 |
| OTU1560        | ---A-----T-----A A-----                                                              | 438 |

**Figure S6.** Alignment of our four most abundant uncultured cyanobacterial potential pathogen sequences (that were assigned to *Leptolyngbya*) to the unidentified bacterium clone sequence [S41] with the highest similarity from the BLAST results (see table S6).

## REFERENCES

- S1. Rjaniemi, P., Hrouzek, P., Kastovska, K., Willame, R., Rantala, A., Hoffman, L., Komarek, J. & Sivonen, K. 2005 Phylogenetic and morphological evaluation of the genera *Anabaena*, *Aphanizomenon*, *Trichormus* and *Nostoc* (Nostocales, Cyanobacteria) *Int. J. Syst. Evol. Microbiol.* **55**, 11-26 (DOI: 10.1099/ijs.0.63276-0)
- S2. Blackburn, S. 2008 Microalgal applications in bioindustry. *Microbiology Australia* **29**, 30-31.
- S3. Waterbury, J. & Stanier, R. 1977 Two unicellular cyanobacteria which reproduce while budding. *Arch. Microbiol.* **115**, 249-257.
- S4. Litchman, E. 2010 Invisible invaders: non-pathogenic invasive microbes in aquatic and terrestrial ecosystems. *Ecol. Lett.* **13**, 1560-1572. (DOI: 10.1111/j.1461-0248.2010.01544.x)
- S5. Nakamura, Y., Kaneko, T., Sato, S., Mimuro, M., Hiyashita, H., Tsuchiya, T., Sasamoto, S., Watanabe, A., Kawashima, K., Kishida, Y., *et al.* 2003 Complete genome structure of *Gloeobacter violaceus* PCC 7421, a cyanobacterium that lacks thylakoids *DNA Res.* **10**, 137-145.
- S6. Karsten, U. & Garcia-Pichel, F. 1996 Carotenoids and mycosporine-like amino acids compounds in members of the genus *Microcoleus* (Cyanobacteria): a chemosystematic study. *System. Appl. Microbiol.* **19**, 285-294.
- S7. Holmes, A. J., Tujula, N. A., Holley, M., Contos, A., James, J. M., Rogers, P. & Gillings, M. R. 2001 Phylogenetic structure of unusual aquatic microbial formations in Nullarbor caves, Australia. *Environ. Microbiol.* **3**, 256-264.
- S8. Chistoserdov, A. Y., Boyd, J., Mathews, F. S. & Lidstrom, M. E. 1992 The genetic organization of the *mau* gene cluster of the facultative autotroph *Paracoccus denitrificans*. *Biochem. Biophys. Res. Commun.* **184**, 1226-1234.

- S9. Komarek, J. & Komarkova, J. 2004 Taxonomic review of the cyanoprokaryotic genera *Planktothrix* and *Planktothricoides*. *Czech Phycology* 4, 1-18.
- S10. Rocap, G., Larimer, F. W., Lamerdin, J., Malfatti, S., Chain, P., Ahlgren, N. A., Arellano, A., Coleman, M., Hauser, L., Hess, W. R., *et al.* 2003 Genome divergence in two *Prochlorococcus* ecotypes reflects oceanic niche differentiation. *Nature* **424**, 1042-1047.
- S11. Pinevich, A., Velichko, N. & Ivanikova, N. 2012 Cyanobacteria of the genus *Prochlorothrix*. *Front. Microbiol.* **3**, 1-13. (DOI: 10.3389/fmicb.2012.00173)
- S12. Madigan, M. T. 2003 Anoxygenic phototrophic bacteria from extreme environments. *Photosynth. Res.* **76**, 157-171.
- S13. Qiang, H., Zarmi, Y. & Richmond, A. 1998 Combined effects of light intensity, light-path and culture density on output rate of *Spirulina platensis* (Cyanobacteria). *Eur. J. Phycol.* **33**, 164-171.
- S14. Zouni, A., Witt, H., Kern, J., Fromme, P., Krauß, Saenger, W. & Orth, P. 2000 Crystal structure of photosystem II from *Synechococcus elongatus* at 3.8 Å resolution. *Nature* **409**, 739-743. (DOI: 10.1038/35055589)
- S15. Kamiya, N. & Shen, J. 2003 Crystal structure of oxygen-evolving photosystem II from *Thermosynechococcus vulcanus* at 3.7- Å resolution. *Proc. Natl. Acad. Sci.* **100**, 98-103. (DOI: 10.1073/pnas.0135651100)
- S16. Sorokin, D. Y., Lysenko, A. M., Mityushina, L. L., Tourova, T. P., Jones, B. E., Rainey, F. A., Robertson, L. A. & Kuenen, G. J. 2001 *Thioalkalimicrobium aerophilum* gen. nov., sp. nov. and *Thioalkalimicrobium sibericum* sp. nov., and *Thioalkalivibrio versutus* gen. nov., sp. nov., *Thioalkalivibrio nitratis* sp. nov. and *Thioalkalibibrio denitrificans* sp. nov, novel obligately alkaliphilic and obligately chemolithoautotrophic sulfur-oxidizing bacteria from soda lakes. *Int. J. Syst. Evol. Microbiol.* **51**, 565-580.



- S17. Overmann, J., Fischer, U. & Pfennig, N. 1992 A new purple sulfur bacterium from saline littoral sediments, *Thiorhodovibrio winogradskyi* gen. nov. and sp. nov. *Arch. Microbiol.* **157**, 329-335.
- S18. Capone, D. G., Zehr, J. P., Paerl, H. W. Bergman, B. & Carpenter, E. J. 2014 *Trichodesmium*, a globally significant marine cyanobacterium. *Science* **276**, 1221-1229. (DOI: 10.1126/science.276.5316.1221)
- S19. Urdiain, M., Lopez-Lopez, A., Gonzalo, C., Busse, H., Langer, S., Kampfer, P. & Rossello-Mora, R. 2008 Reclassification of *Rhodobium marinum* and *Rhodobium pfennigii* as *Afifella marina* gen. nov. comb. nov. and *Afifella pfennigii* comb. nov., a new genus of photoheterotrophic *Alphaproteobacteria* and emended descriptions of *Rhodobium*, *Rhodobium orientis* and *Rhodobium gokarnense*. *System. Appl. Microbiol.* **31**, 339-351. (DOI: 10.1016/j.syapm.2008.07.002)
- S20. McIlroy, S. J., Kristiansen, R., Albertson, M., Karst, S. M., Rossetti, S., Nielsen, J. L., Tandoi, V., Seviour, R. J. & Nielsen, P. H. 2013 Metabolic model for the filamentous ‘*Candidatus* *Microthrix parvicella*’ based on genomic and metagenomic analyses. *ISME J.* **7**, 1161-1172. (DOI: 10.1038/ismej.2013.6)
- S21. Kunze, B., Jansen, R., Sasse, F., Hofle, G. & Reichenbach, H. 1998 Apicularens A and B, new cytostatic macrolides from *Chondromyces* species (myxobacteria): production, physio-chemical and biological properties. *J. Antibiot.* **51**, 1075-1080.
- S22. Spring, S., Lunsdorf, H., Fuchs, B. M. & Tindall, B. J. 2009 The photosynthetic apparatus and its regulation in the aerobic gammaproteobacterium *Congregibacter litoralis* gen. nov., sp. nov. *PLoS ONE* **4**, e4866. (DOI: 10.1371/journal.pone.0004866)
- S23. Takahashi, M., Suzuki, K. & Nakagawa, Y. 2006 Emendation of the genus *Flammeovirga* and *Flammeovirga aprica* with the proposal of *Flammeovirga arenaria*

- nom. rev., comb. nov. and *Flammeovirga yaeyamensis* sp. nov. *Int. J. Syst. Evol. Microbiol.* **56**, 2095-2100. (DOI: 10.1099/ijms.0.64324-0)
- S24. Lee, H. S., Kany, S. G., Kwon, K. K., Lee, J. & Kim, S. 2011 Genome sequence of the algicidal bacterium *Kordia algicida* OT-1. *J. Bacteriol.* **193**, 4031-4032. (DOI: 10.1128/JB.05241-11)
- S25. Sly, L. I., Taghavi, M. & Fegan, M. 1998 Phylogenetic heterogeneity within the genus *Herpetosiphon*: transfer of the marine species *Herpetosiphon cohaerens*, *Herpetosiphon nigricans* and *Herpetosiphon persicus* to the genus *Lewinella* gen. nov. in the *Flexibacter-Bacteriodes-Cytophaga* phylum *Int. J. Syst. Bacteriol.* **48**, 731-737.
- S26. Bazylnski, D. A., Williams, T. J., Lefevre, T., Berg, R. J., Zhang, C. L., Bowser, S. S., Dean, A. J. & Beveridge, T. J. 2013 *Magnetococcus marinus* gen. nov., sp. nov., a marine, magnetotactic bacterium that represents a novel lineage (*Magnetococcaceae* fam. Nov., *Magnetococcales* ord. nov.) at the base of the *Alphaproteobacteria*. *Int. J. Syst. Evol. Microbiol.* **68**, 801-808. (DOI: 10.199/ijms.0.038927-0)
- S27. Calugay, R. J., Takeyama, H., Mukoyama, D., Fukuda, Y., Suzuki, T., Kanoh, K. & Matsunaga, T. 2006 Catechol siderophore excretion by magnetotactic bacterium *Magnetospirillum magneticum* AMB-1. *J. Biosci. Bioeng.* **101**, 445-447. (DOI: 10.1263/jbb.101.445)
- S28. Patt, T. E., Cole, G. C. & Hanson, R. S. 1976 *Methylobacterium*, a new genus of facultatively methylotrophic bacteria. *Int. J. Syst. Bacteriol.* **26**, 226-229.
- S29. Urios, L., Michotey, V., Intertaglia, L., Lesongeur, F. & Lebaron, P. 2008 *Nisaea denitrificans* gen. nov., sp. nov. and *Nisaea nitritireducens* sp. nov., two novel members of the class *Alphaproteobacteria* from the Mediterranean Sea. *Int. J. Syst. Evol. Microbiol.* **58**, 2336-2341. (DOI: 10.1099/ijms.0.64592-0)

- S30. Cho, J. & Giovannoni, S. J. 2004 *Oceanicola granulosis* gen. nov., sp. nov. and *Oceanicola batsensis* sp. nov., poly- $\beta$ -hydroxybutyrate-producing marine bacteria in the order 'Rhodobacterales.' *Int. J. Syst. Evol. Microbiol.* **54**, 1129-1136. (DOI: 10.1099/ijs.0.03015-0)
- S31. Chin, K., Liesack, W. & Janssen, P. H. 2001 *Optitus terrae* gen. nov., sp. nov., to accommodate novel strains of the division 'Verrucomicrobia' isolated from rice paddy soil. *Int. J. Syst. Evol. Microbiol.* **51**, 1965-1968.
- S32. Glockner, F. O., Kube, M., Bauer, M., Teeling, H., Lombardot, T., Ludwig, W., Gade, D., Beck, A., Borzym, K., Heitmann, H., *et al.* 2003 Complete genome sequence of the marine planctomycete *Pirellula* sp. strain 1. *Proc. Nat. Acad. Sci.* **100**, 8298-8303. (DOI: 10.1073/pnas.1431443100)
- S33. Gade, D., Gobom, J. & Rabus, R. 2005 Proteomic analysis of carbohydrate catabolism and regulation in the marine bacterium *Rhodopirellula baltica*. *Proteomics* **5**, 3672-3683. (DOI: 10.1002/pmic.200401200)
- S34. Martens, T., Heidorn, T., Pukall, R., Simon, M., Tindall, B. J. & Brinkhoff, T. 2006 Reclassification of *Roseobacter gallaeciensis* Ruiz-Ponte *et al.* 1998 as *Phaeobacter gallaeciensis* gen. nov., comb. nov., description of *Phaeobacter inhibens* sp. nov., reclassification of *Ruegeria algicola* (Lafay *et al.* 1995) Uchino *et al.* 1999 as *Marinovum algicola* gen. nov., comb. nov., and emended descriptions of the genera *Roseobacter*, *Ruegeria* and *Leisingera*. *Int. J. Syst. Evol. Microbiol.* **56**, 1293-1304. (DOI: 10.1099/ijs.0.63724-0)
- S35. An, D., Im, W., Yang, H. & Lee, S. 2006 *Shinella granuli* gen. nov., sp. nov., and proposal of the reclassification of *Zoogloea ramigera* ATCC 19623 as *Shinella zoogloeoidea* sp. nov. *Int. J. Syst. Evol. Microbiol.* **56**, 443-448. (DOI: 10.1099/ijs.0.63942-0)

- S36. Werren, J. H. 1997 Biology of *Wolbachia*. *Annu. Rev. Entomol.* **42**, 587-609.
- S37. Anderson, B. E., Neuman, M. A. 1997 *Bartonella* spp. As emerging human pathogens. *Clin. Microbiol. Rev.* **10**, 203-219.
- S38. Wormser, G. P. & Bottone, E. J. 1983 *Cardiobacterium hominis*: review of microbiologic and clinical features. *Clin. Infect. Dis.* **5**, 680-691. (DOI: 10.1093/clinids/5.4.680)
- S39. Coenye, T., Goris, J., Spilker, T., Vandamme, P. & LiPuma, J. J. 2002 Characterization of unusual bacteria isolated from respiratory secretions of cystic fibrosis patients and description of *Iquilinus limosus* gen. nov, sp. Nov. *J Clin. Microbiol.* **40**, 2062-2069. (DOI: 10.1128/JCM.40.6.2062-2069.2002)
- S40. Myers, J. L., Sekar, R. & Richardson, L. L. 2007 Molecular detection and ecological significance of the cyanobacterial genera *Geitlerinema* and *Leptolyngbya* in black band disease of corals. *Appl. Environ. Microbiol.* **73**, 5173-5182. (DOI: 10.1128/AEM.00900-07)
- S41. Arotsker, L., Rasoulouniriana, D., Siboni, N., Ben-Dov, E., Kramarsky-Winter, E., Loya, Y. & Kushmaro, A. 2010 BBD microbial consortium seasonal changes. Unpublished.
- S42. Rohwer, F. 2008 Corals as microbial landscapes. Unpublished.
- S43. Mobberley, J. M., Ortega, M. C. & Foster, J. S. 2012 Comparative microbial diversity analyses of modern marine thrombolitic mats by barcoded pyrosequencing. *Environ. Microbiol.* **14**, 82-100.
- S44. Thiel, V., Neulinger, S. C., Staufenberg, T., Schmaljohann, R. & Imhoff, J. F. 2007 Spatial distribution of sponge-associated bacteria in the Mediterranean sponge *Tethya aurantium*. *FEMS Microbiol. Ecol.* **59**, 47-63.

- S45. Edgcomb, V. P., Bernhard, J. M., Beaudoin, D. J., Pruss, S., Welander, P. V., Schubotz, F., Mehay, S., Gillespie, A. L. & Summons, R. E. 2012 Molecular indicators of microbial diversity in oolitic sands of Highborne Cay, Bahamas. Unpublished.
- S46. Sunagawa, S., DeSantis, T. Z., Piceno, Y. M., Brodie, E. L., DeSalvo, M. K., Voolstra, C. R., Weil, E., Andersen, G. L. & Medina, M. 2009 Bacterial diversity and White Plague Disease-associated community changes in the Caribbean coral *Montastraea faveolata*. *ISME J.* **3**, 512-521.
- S47. Bourne, D. 2005 Microbiological assessment of a disease outbreak on corals from Magnetic Island (Great Barrier Reef, Australia). *Coral Reefs* **24**, 304-312.
- S48. Siboni, N., Martinez, S. & Kushmaro, A. 2009 Conditioning film and initial biofilm formation on electrochemical CaCO<sub>3</sub> deposition on a metallic net in the marine environment. Unpublished.
- S49. Sunagawa, S., Woodley, C. M. & Medina, M. 2010 Threatened corals provide underexplored microbial habitats. *PLoS ONE* **5**, E9554.
- S50. Werner, U., Blazejak, A., Bird, P., Eickert, G. & de Beer, D. 2006 Photosynthesis in coral reef sediments (Heron Reef, Australia). Unpublished.
- S51. Sorensen, K. B., Glazer, B., Hannides, A. & Gaidos, E. 2007 Spatial structure of the microbial community in sandy carbonate sediment. *Mar. Ecol. Prog. Ser.* **346**, 61-74.
- S52. Raina, J. B., Tapiolas, D., Willis, B. L. & Bourne, D. G. 2009 Coral-associated bacteria and their role in the biogeochemical cycling of sulfur. *Appl. Environ. Microbiol.* **75**, 3492-3501.
- S53. Fernandez-Piquer, J., Bowman, J. P., Ross, T. & Tamplin, M. L. 2012 Molecular analysis of the bacterial communities in the live Pacific oyster (*Crassostrea gigas*) and the influence of postharvest temperature on its structure. *J. Appl. Microbiol.* **112**, 1134-1143.

- S54. Myshrall, K. L., Mobberley, J. M., Green, S. J., Visscher, P. T., Havemann, S. A., Reid, R. P. & Foster, J. S. 2010 Biogeochemical cycling and microbial diversity in the thrombolitic microbialites of Highborne Cay, Bahamas. *Geobiology* **8**, 337-354.
- S55. Godwin, S. E., Borneman, J., Bent, E. & Pereg-Gerk, L. 2008 Analysis of the bacterial communities associated with subtropical white syndrome of the coral *Turbinaria mesenterina* by oligonucleotide fingerprinting of ribosomal genes. Unpublished.
- S56. Starke, V., Kirshtein, J., Fogel, M. L. & Steele, A. 2013. Microbial community composition and endolith colonization at an Arctic thermal spring are driven by calcite precipitation. *Environ. Microbiol. Rep.* **5**, 648-659.
- S57. Reis, A. M., Araujo, S. D. Jr., Moura, R. L., Francini-Filho, R. B., Pappas, G. Jr., Coelho, A. M., Kruger, R. H. & Thompson, F. L. 2009 Bacterial diversity associated with the Brazilian endemic reef coral *Mussismilia braziliensis*. *J. Appl. Microbiol.* **106**, 1378-1387.
- S58. Angermeier, H., Kamke, J., Abdelmohsen, U. R., Krohne, G., Pawlik, J. R., Lindquist, N. L. & Hentschel, U. 2011 The pathology of sponge orange band disease affecting the Caribbean barrel sponge *Xestospongia muta*. *FEMS Microbiol. Ecol.* **75**, 218-230.
- S59. Mukhtar, S., Malik, K. A., Mirza, M. S. & Mehnaz, S. 2014 Microbial diversity and metagenomic analysis of the rhizosphere of *Haloxylon recurvum* growing under highly saline conditions. Unpublished.
- S60. Cumbers, J. & Rothschild, L. J. 2012 Reexamination of the genus *Chroococcidiopsis* by phylogeny and halotolerance. Unpublished.
- S61. Witt, V., Wild, C. & Uthicke, S. 2012 Terrestrial runoff controls the bacterial community composition of biofilms along a water quality gradient in the Great Barrier Reef. *Appl. Environ. Microbiol.* **78**, 7786-7791.

- S62. Li, Q. & Jiao, N. Z. 2013 Biological responses to iron-related nutrient enrichment of phytoplankton and heterotrophic bacteria in the western Pacific Ocean. Unpublished.
- S63. Thornburg, C. C., Youssef, D. T. A., Shaala, L. A. & McPhail, K. L. 2012 New phormidolides from a Red Sea *Leptolyngbya* cyanobacterium. Unpublished.
- S64. Hunter, E. M., Mills, H. J. & Kostka, J. E. 2006 Microbial community diversity associated with carbon and nitrogen cycling in permeable shelf sediments. *Appl. Environ. Microbiol.* **72**, 5689-5701.
- S65. Mazard, S. L., Fuller, N. J., Orcutt, K. M., Bridle, O. and Scanlan, D. J. 2004 PCR analysis of the distribution of unicellular cyanobacterial diazotrophs in the Arabian Sea. *Appl. Environ. Microbiol.* **70**, 7355-7364.
- S66. Foster, J. S., Green, S. J., Ahrendt, S. R., Golubic, S., Reid, R. P., Hetherington, K. L. & Bebout, L. 2009 Molecular and morphological characterization of cyanobacterial diversity in the stromatolites of Highborne Cay, Bahamas, *ISME J.* **3**, 573-587.
- S67. Edlund, A. & Jansson, J. K. 2006 Microbiomics displays changes in dominant and active bacterial communities before and after dredging of highly polluted Baltic Sea sediments. *Appl. Environ. Microbiol.* **72**, 6800-6807.
- S68. Dojani, S., Kauff, F., Weber, B. & Buedel, B. 2014 Genotypic and phenotypic diversity of cyanobacteria in biological soil crusts of the succulent Karoo and Nama Karoo of Southern Africa. *Microb. Ecol.* **67**, 286-301. (DOI: 10.1007/s00248-013-0301-5)
- S69. Kimes, N. E., Johnson, W. R., Torralba, M., Nelson, K. E., Weil, E. & Morris, P. J. 2013 The *Montastraea faveolata* microbiome: ecological and temporal influences on a Caribbean reef-building coral in decline. *Environ. Microbiol.* **15**, 2082-2094.
- S70. Goh, F., Allen, M. A., Leuko, S., Kawaguchi, T., Decho, A. W., Burns, B. P. & Neilan, B. A. 2009 Determining the specific microbial populations and their spatial distribution

within the stromatolite ecosystem of Shark Bay. *ISME J.* **4**, 383-396. (DOI: 10.1038/ismej.2008.114)

- S71. Tajima, N., Sato, S., Maruyama, F., Kurokawa, K., Ohta, H., Tabata, S., Sekine, K., Moriyama, T. & Sato, N. 2013 Analysis of the complete chloroplast genome of the unicellular red alga *Porphyridium purpureum*. Unpublished.
- S72. Luan, X., Duan, J. & Chi, Z. 2011 Unpublished.
- S73. Sihvonen, L. M., Lyra, C., Fewer, D. P., Rajaniemi-Wacklin, P., Lehtimäki, J. M., Wahlsten, M. & Sivonen, K. 2007 Strains of the cyanobacterial genera *Calothrix* and *Rivularia* isolated from the Baltic Sea display cryptic diversity and are distantly related to *Gloeotrichia* and *Tolypothrix*. *FEMS Microbiol. Ecol.* **61**, 74-84.
- S74. Acosta-Gonzalez, A., Rossello-Mora, R. & Marques, S. 2013 Characterization of the anaerobic microbial community in oil-polluted subtidal sediments: aromatic biodegradation potential after the Prestige oil spill. *Environ. Microbiol.* **15**, 77-92.
- S75. Johnson, W. R., Weil, E., Smith, G. W., Nelson, K. E. & Morris, P. J. 2008 Composition and diversity of bacterial communities associated with healthy and diseased colonies of the Caribbean coral *Montastrea faveolata*. Unpublished.
- S76. Dai, J. & Chen, D. 2013 Influence of artificial substrates on periphytic bacterial community composition in eutrophic Lake Taihu. Unpublished.
- S77. Yeo, S. K., Huggett, M. J., Eiler, A. & Rappe, M. S. 2013 Coastal bacterioplankton community dynamics in response to a natural disturbance. *PLoS ONE* **8**, E56207.
- S78. Garren, M., Smriga, S. & Azam, F. 2008 Gradients of coastal fish farm effluents and their effect on coral reef microbes *Environ. Microbiol.* **10**, 2299-2312.
- S79. Meron, D., Atias, E., Iasur Kruh, L., Elifantz, H., Minz, D., Fine, M. & Banin, E. 2011 The impact of reduced pH on the microbial community of the coral *Acropora eurystoma*. *ISME J.* **5**, 51-60.



- S80. Martins, J., Leao, P. N., Ramos, V. & Vasconcelos, V. 2013 N-terminal protease gene phylogeny reveals the potential for novel cyanobactin diversity in cyanobacteria. *Mar. Drugs* **11**, 4902-4916.
- S81. Ohki, K., Kamiya, M., Honda, D., Kumazawa, S. & Ho, K. K. 2008 Morphological and phylogenetic studies on unicellular diazotrophic cyanobacteria (Cyanophytes) isolated from the coastal waters around Singapore *J. Phycol.* **44**, 142-151.
- S82. Welsh, E. A., Liberton, M., Stockel, J., Loh, T., Elvitigala, T., Wang, C., Wollam, A., Fulton, R. S., Clifton, S. W., Jacobs, J. M., *et al.* 2008 The genome of *Cyanothece* 51142, a unicellular diazotrophic cyanobacterium important in the marine nitrogen cycle. *Proc. Natl. Acad. Sci. U.S.A.* **105**, 15094-15099.
- S83. Bajerski, F. & Wagner, D. 2013 Bacterial succession in Antarctic soils of two glacier forefields on Larsemann Hills, East Antarctica. *FEMS Microbiol. Ecol.* **85**, 128-142.
- S84. Piggot, A. M., Klaus, J. S., Johnson, S., Phillips, M. C. & Solo-Gabriele, H. M. 2012 Relationship between enterococcal levels and sediment biofilms at recreational beaches in South Florida. *Appl. Environ. Microbiol.* **78**, 5973-5982.
- S85. Harris, J. K., Caporaso, J. G., Walker, J. J., Spear, J. R., Gold, N. J., Robertson, C. E., Hugenholtz, P., Goodrich, J., McDonald, D., Knights, D., *et al.* 2013 Phylogenetic stratigraphy in the Guerrero Negro hypersaline microbial mat. *ISME J.* **7**, 50-60. (DOI: 10.1038/ismej.2012.79)
- S86. Silva, C. S., Genuario, D. B., Vaz, M. G. & Fiore, M. F. 2014 Phylogeny of culturable cyanobacteria from Brazilian mangroves. *Syst. Appl. Microbiol.* **37**, 100-112.
- S87. Kimura, N., Azuma, N. & Tonouchi, A. 2013 Analysis of bacterial communities in the sediment of Lake Jusan. Unpublished.
- S88. Tucker, C. P., Pettigrove, V. & Parsons, Y. M. 2007 Impact of anthropogenic disturbance on active bacterial communities in urban creek sediments. Unpublished.

- S89. Lundberg, R., Birgel, D., Meister, P., Horath, T. D., Rezende, C., McKenzie, J. A. & Vasconcelos, C. 2010 Stromatolite formation in a methanogenic microbial community in Lagoa Salgada, Brazil: a phylogenetic, lipid biomarker and stable isotope study. Unpublished.
- S90. Lucas, S., Copeland, A., Lapidus, A., Glavina del Rio, T., Dalin, E., Tice, H., Bruce, D., Goodwin, L., Pitluck, S., Sims, D., *et al.* 2011 Complete sequence of chromosome of *Cyanothece* sp. PCC 8802. Unpublished.
- S91. Berrendero, E., Perona, E. & Mateo, P. 2008 Genetic and morphological characterization of *Rivularia* and *Calothrix* (Nostocales, Cyanobacteria) from running water. *Int. J. Syst. Evol. Microbiol.* **58**, 447-460.
- S92. Wong, F. K., Lacap, D. C., Lau, M. C., Aitchison, J. C., Cowan, D. A. & Pointing, S. B. 2010 Hypolithic microbial community of quartz pavement in the high-altitude tundra of central Tibet. *Microb. Ecol.* **60**, 730-739.
- S93. Myers, J. L., Sekar, R. & Richardson, L. L. 2007 Molecular detection and ecological significance of the cyanobacterial genera *Geitlerinema* and *Leptolyngbya* in black band disease of corals. *Appl. Environ. Microbiol.* **73**, 5173-5182.
- S94. Nakayama, T., Ikegami, Y., Nakayama, T., Ishida, K., Inagaki, Y. & Inouye, I. 2011 Spheroid bodies in rhopalodiacean diatoms were derived from a single endosymbiotic cyanobacterium. *J. Plant Res.* **124**, 93-97.
- S95. Taton, A., Grubisic, S., Balthasart, P., Hodgson, D. A., Laybourn-Parry, J. & Wilmotte, A. 2006 Biogeographical distribution and ecological ranges of benthic cyanobacteria in East Antarctic lakes. *FEMS Microbiol. Ecol.* **57**, 272-289.
- S96. Yang, H. Q., Shen, J. W., Wang, Y. & Zhao, N. 2012 Occurrence of the black band disease on *Echinopora lamellosa* corals of the Shidao, Xisha Islands, South China Sea. Unpublished.

- S97. Bik, E. M., Costello, E. K., Carlin, K. P., Jensen, E. D., Venn-Watson, S. & Relman, D. A. 2013 Sharp boundary between microbiota of marine mammals and the sea. Unpublished.
- S98. Olapade, O. A. 2012 Molecular detection of the occurrence of methanotrophic bacteria. Unpublished.
- S99. O'Neill, A. H., Crowe, S. A. & Fowle, D. A. 2008 Phototrophic microbial communities build mesophilic laminated Fe-formations on Sulawesi, Indonesia. Unpublished.
- S100. Ionescu, D., Oren, A., Hindiyeh, M. Y. & Malkawi, H. I. 2006 The thermophilic cyanobacteria of the Zerka Ma'in thermal springs. Unpublished.
- S101. Sekar, R., Kaczmarzky, L. T. & Richardson, L. L. 2008 Microbial community composition of black band disease on the coral host *Siderastrea siderea* from three regions of the wider Caribbean. *Mar. Ecol. Prog. Ser.* **362**, 85-98.
- S102. Witt, V., Wild, C. & Uthicke, S. 2011 Effect of substrate type on bacterial community composition in biofilms from the Great Barrier Reef. *FEMS Microbiol. Lett.* **323**, 188-195.
- S103. Sato, Y., Willis, B. L. & Bourne, D. G. 2013 Pyrosequencing-based profiling of archaeal and bacterial 16S rRNA genes identifies a novel archaeon associated with black band disease in corals. *Environ. Microbiol.* **15**, 2994-3007.
- S104. Taton, A., Grubisic, S., Ertz, D., Hodgson, D. A., Picardi, R., Biondi, N., Tredici, M., Mainini, M., Losi, D., Marinelli, F. & Wilmotte, A. 2006 Polyphasic study of antarctic cyanobacterial strains. *J. Phycol.* **42**, 1257-1270.
- S105. Teeling, H., Fuchs, B. M., Becher, D., Klockow, C., Gardebrecht, A., Bennke, C. M., Kassabgy, M., Huang, S., Mann, A. J., Waldmann, J., *et al.* 2012 Substrate-controlled succession of marine bacterioplankton populations induced by a phytoplankton bloom. *Science* **336**, 608-611.
